# Supplementary material for: Global COVID-19 pandemic demands joint interventions for the suppression of future waves
Source: PubMed Central journal article supplement (PMC7585010; doi:10.1073/pnas.2012002117), 2020-09-28
Supplement: pnas.2012002117.sapp.pdf [file pnas.2012002117.sapp.pdf]

# PNAS

www.pnas.org

Supplementary Information for

**Title: Global COVID-19 pandemic demands joint interventions to the suppression of future waves**

Ruiyun Li<sup>a,b,c,d,1</sup>, Bin Chen<sup>e,1</sup>, Tao Zhang<sup>a,b,c</sup>, Zehao Ren<sup>a</sup>, Yimeng Song<sup>f</sup>, Yixiong Xiao<sup>a,b,c</sup>, Lin Hou<sup>g,h</sup>, Jun Cai<sup>a</sup>, Bo Xu<sup>a,b,c</sup>, Miao Li<sup>a</sup>, Karen Kie Yan Chan<sup>a</sup>, Ying Tu<sup>a</sup>, Mu Yang<sup>a</sup>, Jing Yang<sup>i</sup>, Zhaoyang Liu<sup>g,h</sup>, Chong Shen<sup>g,h</sup>, Che Wang<sup>g,h</sup>, Lei Xu<sup>a,b,c</sup>, Qiyong Liu<sup>j</sup>, Shuming Bao<sup>k</sup>, Jianqin Zhang<sup>l</sup>, Yuhai Bi<sup>i</sup>, Yuqi Bai<sup>a,b,c</sup>, Ke Deng<sup>g,h</sup>, Wusheng Zhang<sup>m</sup>, Wenyu Huang<sup>a</sup>, Jason D. Whittington<sup>n</sup>, Nils Chr. Stenseth<sup>a,n,2</sup>, Dabo Guan<sup>a,b,c,2</sup>, Peng Gong<sup>a,b,c,2</sup>, Bing Xu<sup>a,b,c,2</sup>

Corresponding to: Nils Chr. Stenseth: [n.c.stenseth@ibv.uio.no](mailto:n.c.stenseth@ibv.uio.no); Dabo Guan: [guandabo@tsinghua.edu.cn](mailto:guandabo@tsinghua.edu.cn); Peng Gong: [penggong@tsinghua.edu.cn](mailto:penggong@tsinghua.edu.cn); Bing Xu: [bingxu@tsinghua.edu.cn](mailto:bingxu@tsinghua.edu.cn).

**This PDF file includes:**

Supplementary text  
Figures S1 to S2  
Tables S1 to S2

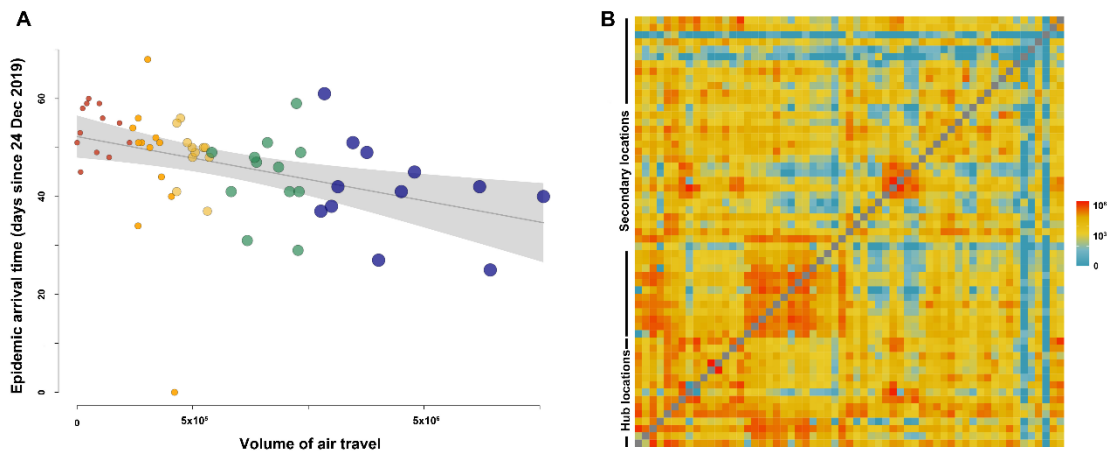

**Fig. S1. Differences among locations in air travel.** (A) Locations with larger volume of air travel tend to have earlier arrival of local transmission. The arrival time is projected as the days since the first arrival of epidemics in Wuhan, i.e. 24 December 2019. (B) Dynamics of air travel between all high-risk locations in 2019.

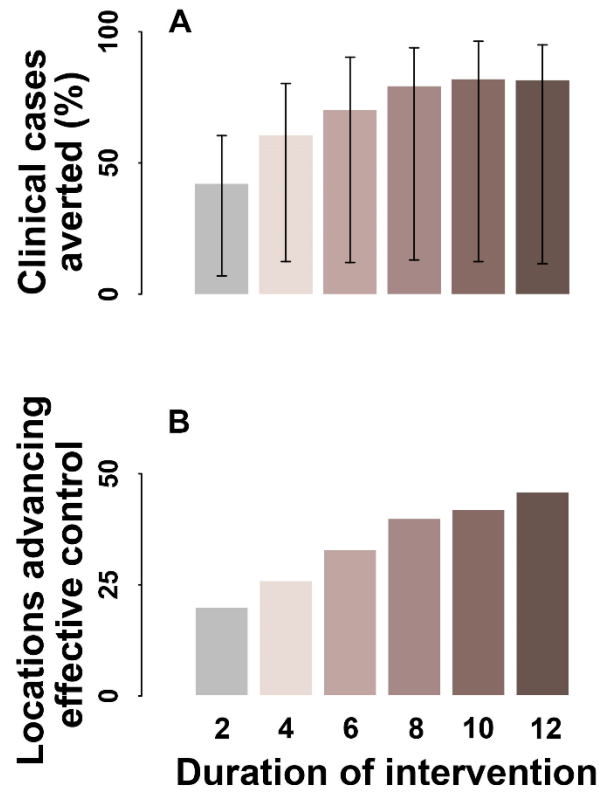

**Fig. S2. Intervention effect through moderate intensity among secondary high-risk locations.** Intensive intervention was implemented in the GIH, followed by moderate intervention among secondary locations. Effectiveness is evaluated by (A) the proportion of clinical cases averted and (B) the number of locations with accelerated achievement of effective control of transmission.

**Table S1. Details of 59 high-risk locations analyzed in this study.**

| ID | Country        | Location             | Population | Climates*      | Intervention Tier |
|----|----------------|----------------------|------------|----------------|-------------------|
| 1  | USA            | New York (NY)        | 8398748    | NH-Temperate   | Hub               |
| 2  | USA            | Bergen (NJ)          | 932202     | NH-Temperate   | Secondary         |
| 3  | USA            | Middlesex (MA)       | 1611699    | NH-Temperate   | Secondary         |
| 4  | USA            | Philadelphia (PA)    | 1584064    | NH-Temperate   | Hub               |
| 5  | USA            | Los Angeles (CA)     | 3990456    | NH-Subtropical | Hub               |
| 6  | USA            | Cook (IL)            | 5150233    | NH-Temperate   | Secondary         |
| 7  | USA            | Wayne (MI)           | 1749343    | NH-Temperate   | Secondary         |
| 8  | USA            | Miami-Dade (FL)      | 2716940    | NH-Subtropical | Secondary         |
| 9  | USA            | New Orleans (LA)     | 391006     | NH-Subtropical | Secondary         |
| 10 | USA            | Fairfield (CT)       | 62105      | NH-Temperate   | Secondary         |
| 11 | USA            | Harris (TX)          | 4713325    | NH-Subtropical | Secondary         |
| 12 | USA            | Fulton (GA)          | 1063937    | NH-Subtropical | Secondary         |
| 13 | USA            | Prince George's (MD) | 909327     | NH-Temperate   | Secondary         |
| 14 | USA            | Marion (OH)          | 36087      | NH-Temperate   | Secondary         |
| 15 | USA            | Washington DC        | 702455     | NH-Temperate   | Hub               |
| 16 | USA            | Marion (IN)          | 28047      | NH-Temperate   | Secondary         |
| 17 | USA            | Fairfax (VA)         | 24019      | NH-Temperate   | Secondary         |
| 18 | USA            | Denver (CO)          | 727211     | NH-Temperate   | Secondary         |
| 19 | Spain          | Community of Madrid  | 6661949    | NH-Temperate   | Secondary         |
| 20 | Italy          | Lombardy region      | 10088484   | NH-Temperate   | Secondary         |
| 21 | Germany        | Munich               | 1471508    | NH-Temperate   | Secondary         |
| 22 | United Kingdom | London               | 8908081    | NH-Temperate   | Hub               |
| 23 | France         | Paris                | 2148271    | NH-Temperate   | Hub               |
| 24 | Turkey         | Ankara               | 5700000    | NH-Temperate   | Secondary         |
| 25 | Iran           | Tehran               | 16000378   | NH-Temperate   | Secondary         |
| 26 | China          | Wuhan                | 11081000   | NH-Subtropical | Secondary         |
| 27 | China          | Shanghai             | 24281400   | NH-Subtropical | Hub               |
| 28 | China          | Beijing              | 15563215   | NH-Temperate   | Secondary         |
| 29 | China          | Guangzhou            | 14904400   | NH-Tropical    | Secondary         |
| 30 | China          | Shenzhen             | 12905000   | NH-Tropical    | Hub               |
| 31 | China          | Wenzhou              | 3039439    | NH-Subtropical | Secondary         |
| 32 | China          | Harbin               | 5115000    | NH-Temperate   | Secondary         |
| 33 | China          | Hongkong             | 7482500    | NH-Tropical    | Hub               |
| 34 | Russia         | Moscow               | 12506468   | NH-Temperate   | Secondary         |

|    |              |                              |          |                |           |
|----|--------------|------------------------------|----------|----------------|-----------|
| 35 | Brazil       | Sao Paulo                    | 12176866 | NH-Subtropical | Secondary |
| 36 | Canada       | Montreal                     | 1704694  | NH-Temperate   | Secondary |
| 37 | Belgium      | Brussels                     | 1208542  | NH-Temperate   | Secondary |
| 38 | Netherlands  | North Brabant                | 2562566  | NH-Temperate   | Secondary |
| 39 | Switzerland  | Zurich                       | 415215   | NH-Temperate   | Hub       |
| 40 | India        | Mumbai                       | 12478447 | NH-Tropical    | Hub       |
| 41 | India        | New Delhi                    | 257803   | NH-Subtropical | Hub       |
| 42 | Portugal     | Porto                        | 287591   | SH-Temperate   | Secondary |
| 43 | Peru         | Lima                         | 8852000  | NH-Tropical    | Secondary |
| 44 | Ireland      | Cork                         | 210000   | NH-Temperate   | Secondary |
| 45 | Sweden       | Stockholm                    | 974073   | NH-Temperate   | Secondary |
| 46 | Austria      | Vienna                       | 1888776  | NH-Temperate   | Secondary |
| 47 | Israel       | Jerusalem                    | 919438   | NH-Subtropical | Hub       |
| 48 | Saudi Arabia | Riyadh                       | 7676654  | NH-Subtropical | Secondary |
| 49 | Japan        | Tokyo                        | 13929286 | NH-Temperate   | Hub       |
| 50 | Singapore    | Singapore                    | 5638700  | NH-Tropical    | Hub       |
| 51 | Chile        | Santiago Metropolitan Region | 7036792  | SH-Subtropical | Secondary |
| 52 | Mexico       | Mexico City                  | 8918653  | NH-Tropical    | Secondary |
| 53 | Ecuador      | Guayas                       | 3645483  | SH-Tropical    | Secondary |
| 54 | Pakistan     | Khyber Pakhtunkhwa           | 35525047 | NH-Subtropical | Secondary |
| 55 | South Korea  | Daegu                        | 2489802  | NH-Temperate   | Secondary |
| 56 | Poland       | Mazovian Voivodeship         | 5384617  | NH-Temperate   | Secondary |
| 57 | Romania      | Suceava                      | 92121    | NH-Temperate   | Secondary |
| 58 | Australia    | Sydney Metropolitan Region   | 5312163  | SH-Subtropical | Secondary |
| 59 | Malaysia     | Selangor                     | 6448400  | NH-Tropical    | Secondary |

---

\*NH: Northern hemisphere; SH: Southern hemisphere

**Table S2. Best-fit model parameters for the simulation of seasonality of temperature across hemisphere and climates.**

| Hemisphere | Climates    | Number of locations | Median estimate of parameters (95%CI) |                  |                  |                |
|------------|-------------|---------------------|---------------------------------------|------------------|------------------|----------------|
|            |             |                     | a0                                    | a1               | b1               | w              |
| Southern   | Temperate   | 1                   | 6.522                                 | 5.275            | 3.738            | 0.018          |
|            |             |                     | (6.164, 6.881)                        | (4.51, 6.04)     | (2.808, 4.668)   | (0.017, 0.018) |
| Southern   | Subtropical | 2                   | 16.85                                 | 6.394            | 1.859            | 0.017          |
|            |             |                     | (16.52, 17.19)                        | (5.928, 6.861)   | (0.907, 2.811)   | (0.017, 0.018) |
| Southern   | Tropical    | 1                   | 26.01                                 | -0.0664          | 1.173            | 0.0200         |
|            |             |                     | (25.95, 26.08)                        | (-0.237, 0.104)  | (1.081, 1.265)   | (0.019, 0.021) |
| Northern   | Temperate   | 34                  | 11.37                                 | -10.93           | -3.817           | 0.0172         |
|            |             |                     | (11.22, 11.53)                        | (-11.17, -10.69) | (-4.253, -3.381) | (0.017, 0.017) |
| Northern   | Subtropical | 13                  | 23.14                                 | -8.915           | -1.427           | 0.0162         |
|            |             |                     | (21.81, 24.47)                        | (-9.287, -8.543) | (-2.341, -0.512) | (0.016, 0.017) |
| Northern   | Tropical    | 8                   | 23.14                                 | -3.052           | 2.714            | 0.0121         |
|            |             |                     | (21.81, 24.47)                        | (-3.776, -2.329) | (0.195, 5.233)   | (0.009, 0.015) |
